# Supplementary material for: Two macrocyclic polyamines as modulators of metal-mediated Aβ40aggregation
Source: Royal Society of Chemistry journal article supplement (doi:10.1039/c5ib00064e), 2015-01-01
Supplement: c5ib00064e1.pdf [file c5ib00064e1.pdf]

## Supporting Information

**Figure S1.** Percentage of soluble  $A\beta_{40}$  (40  $\mu$ M) in the solution without or with  $Zn^{2+}$  or  $Cu^{2+}$  ions in the absence and presence of chelators after incubation at 37°C and pH 7.4 for 24 h in disaggregation assay ( $[A\beta_{40}] : [Cu^{2+}] / [Zn^{2+}] : [L1] / [L2] = 1 : 2 : 4$ ).

**Figure S2.** ThT fluorescence spectra of  $A\beta_{40}$  (20  $\mu$ M) solutions in the absence and presence of  $Zn^{2+}$  (A) or  $Cu^{2+}$  (B) and L1 or L2 after incubation at 37°C for 24 h in disaggregation assay. ( $[A\beta_{40}] : [Cu^{2+}] / [Zn^{2+}] : [L1] / [L2] = 1 : 2 : 4$ ).

**Figure S3.** ThT fluorescence spectra of  $A\beta_{40}$  (20  $\mu$ M) solutions in the presence of L1 or L2 after incubation at 37°C for 24 h(A), 48 h(B), 72 h(C). ( $[A\beta_{40}] : [L1] / [L2] / [EDTA] = 1 : 4$ ).

**Figure S4.** Cell viability (%) of  $A\beta_{40}$  in presence of L1 or L2 toward SH-SY5Y cells tested by the MTT assay ( $[A\beta_{40}] = 10 \mu$ M;  $[A\beta_{40}] : [L1] / [L2] / [EDTA] = 1 : 4$ ).

**Figure S5.** Cell viability (%) of metal ions  $A\beta_{40}$  in the absence or presence of chelators toward SH-SY5Y cells tested by the MTT assay. ( $[A\beta_{40}] = 10 \mu$ M;  $[A\beta_{40}] : [L1] / [L2] / [EDTA] = 1 : 4$ ).

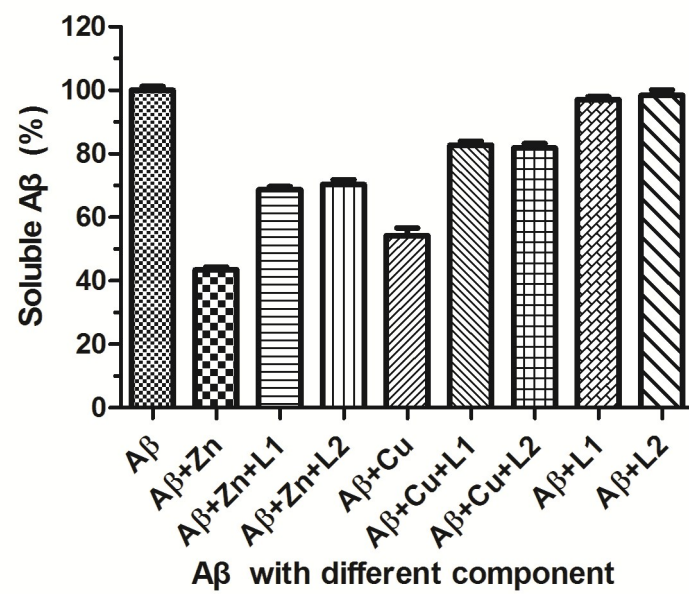

Figure. S1

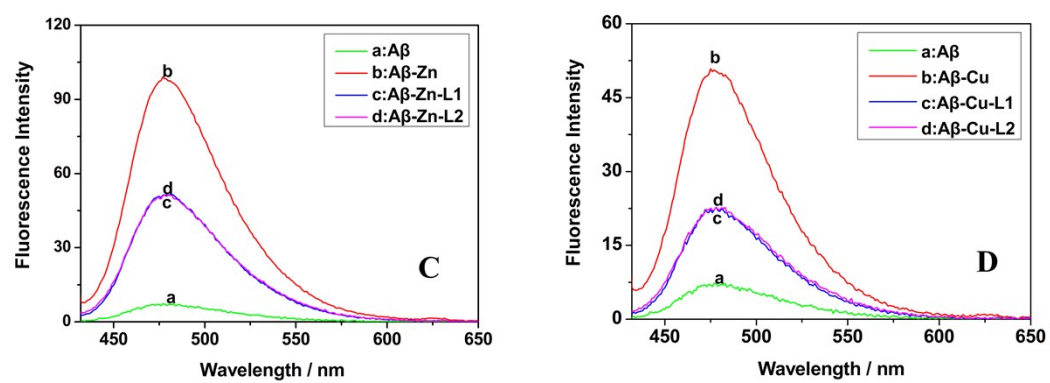

Figure. S2

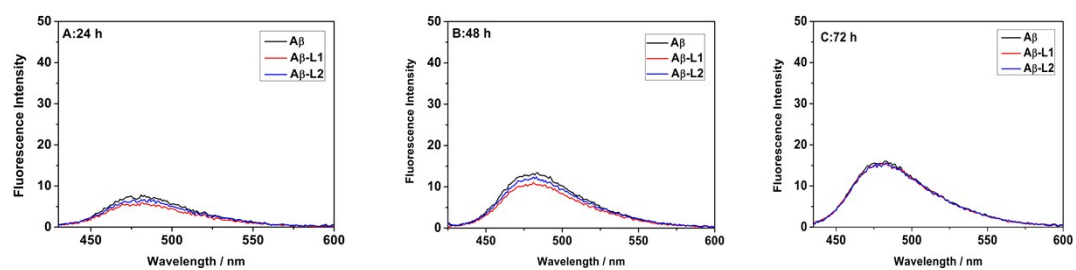

**Figure. S3**

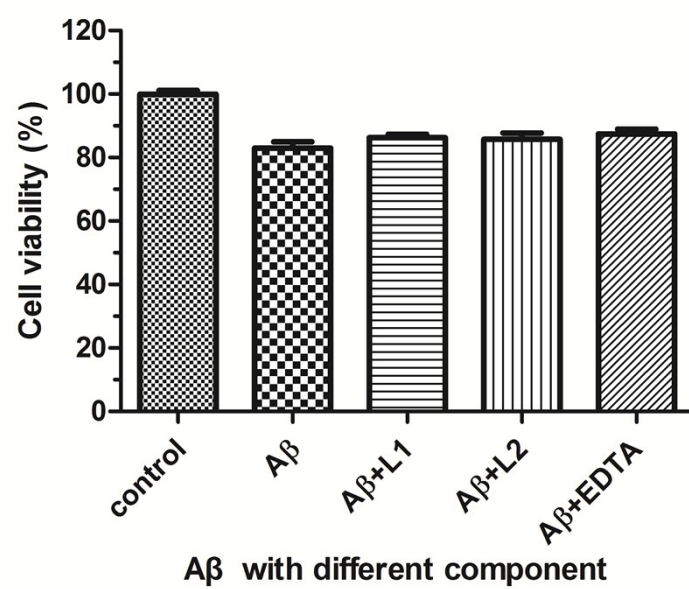

Figure. S4

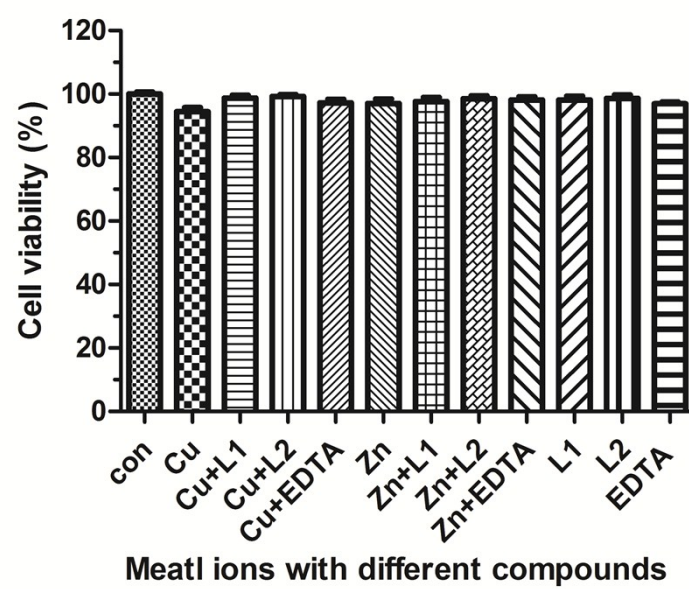

Figure. S5
